# Supplementary material for: Modification of Threonine-825 of SlBRI1 Enlarges Cell Size to Enhance Fruit Yield by Regulating the Cooperation of BR-GA Signaling in Tomato
Source: MDPI journal article supplement (doi:10.3390/ijms22147673), 2021-07-18
Supplement: s1 [file s1]

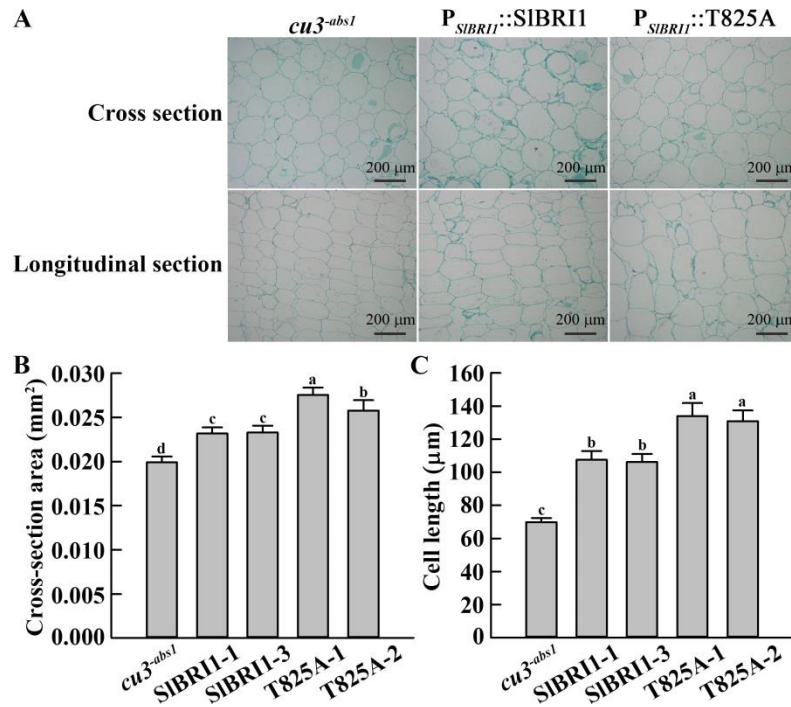

**Figure S1.** SIBRI1 T825A affected the cell size of the stems. (A) Cross section (top) and longitudinal section (bottom) of stems from both the transgenic and *cu3<sup>-abs1</sup>* plants. Scale bars represent 200 μm. (B) The cross-section area of the stem per plant. (C) The cell length of the stem per plant. The data for (B, C) are presented as the mean ± SD (n=5). The different letters indicate significant differences (one-way ANOVA, Tukey's test,  $p < 0.05$ ).

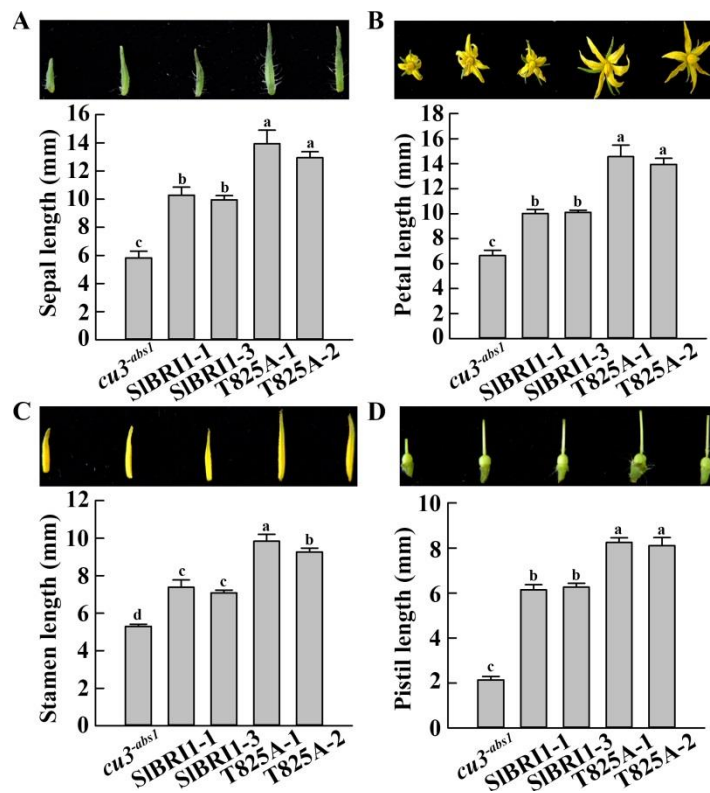

**Figure S2.** SIBRI1 T825A affected the development of the floral organs. (A) Top, phenotypes of a single

sepal per plant. Bottom, sepal length per plant. (B) Top, phenotypes of a single petal per plant. Bottom, petal length per plant. (C) Top, phenotypes of a single stamen per plant. Bottom, stamen length per plant. (D) Top, phenotypes of a single pistil per plant. Bottom, pistil length per plant. The floral organs of (A-D) shown on the top from left to right are as follows: *cu3-abs1*, SIBRI1-1, SIBRI1-3, T825A-1, and T825A-2. The data for (A-D) are presented as the mean  $\pm$  SD (n=6). The different letters indicate significant differences (one-way ANOVA, Tukey's test,  $p < 0.05$ ).

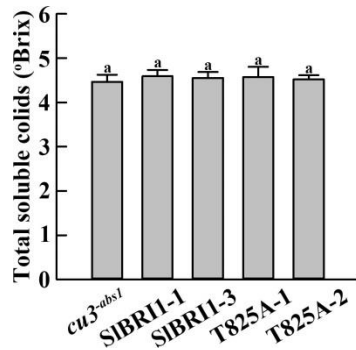

**Figure S3.** SIBRI1 T825A had no influence on fruit quality during the red ripe period. The data are presented as the mean  $\pm$  SD (n=15). The different letters indicate significant differences (one-way ANOVA, Tukey's test,  $p < 0.05$ ).

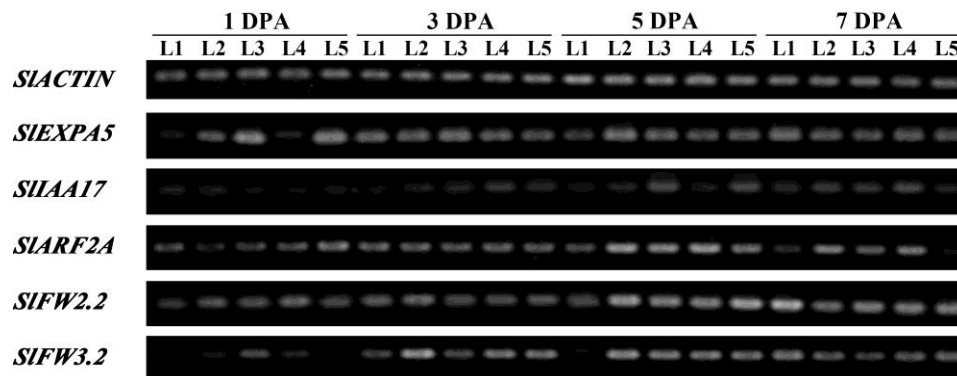

**Figure S4.** SIBRI1 T825A had no influence on the relative transcript levels of *SIIAA17*, *SIARF2A*, *SIEXPA5*, *FW2.2* and *FW3.2*. *SIIACTIN* was used as a reference gene in tomato. Total RNA from 1 DPA, 3 DPA, 5 DPA, and 7 DPA ovaries from both the transgenic and *cu3-abs1* plants was extracted and transcribed to cDNA. The relative transcript levels were tested by RT-PCR. L1 (Line 1), *cu3-abs1*; L2 (Line 2), SIBRI1-1; L3 (Line 3), SIBRI1-3; L4 (Line 4), T825A-1; L5 (Line 5), T825A-2. Each product had 3 biological replications.

**Table S1.** Primers sequence used in this research

| Primer name                                                  | Primer sequence (5'→3')                                |
|--------------------------------------------------------------|--------------------------------------------------------|
| Promoter of <i>SIBRI1</i> -F                                 | GACCATGATTACGCCAAGCTTCT<br>CCATTTC AATTATTGCTCAAAGG    |
| Promoter of <i>SIBRI1</i> -R                                 | ACCACCCGGGGATCCTCTAGACT<br>TCAAAGATTGAAACTTTATAGCTTAAA |
| <i>SIBRI1</i> -F for tomato transformation                   | TCTTTGAAGTCTAGAGCTCGAGAT<br>GAAAGCTCACAAAACGTGTGTTAAC  |
| <i>SIBRI1</i> -R for tomato transformation                   | GCCCTTGCTCACCATGGTACCCTTA<br>TCGTCGTCATCCTTGTAATC      |
| T825A-F for site mutation                                    | GTTGCCATAGAGGCGAAGAAGAGGA                              |
| T825A-R for site mutation                                    | TCCTCTTCTTCGCCTCTATGGCAAC                              |
| T825D-F for site mutation                                    | GTTGCCATAGAGGACAAGAAGAGGA                              |
| T825D-R for site mutation                                    | TCCTCTTCTTGTCTCTATGGCAAC                               |
| K916E-F for site mutation                                    | GAGTGTGTAGCTATTGAGAAATTGATAC<br>ACG                    |
| K916E-R for site mutation                                    | CGTGTATCAATTTCTCAATAGCTACAACA<br>CTC                   |
| <i>SIBRI1</i> -CD-F for phosphorylation<br>analysis in vitro | GACGATGACAAAGTCAAGCTTGAGA<br>CGAAGAAGAGGAGGAGG         |
| <i>SIBRI1</i> -CD-R for phosphorylation<br>analysis in vitro | TCTGCAGGTACCCGGGAATTCAAGG<br>TGTTTGCTCAGCTCATTG        |
| <i>SI</i> ACTIN-F for qRT-PCR and RT-PCR                     | GTGTGGGCTCACCTACGTTT                                   |
| <i>SI</i> ACTIN-R for qRT-PCR and RT-PCR                     | ACAATCCCAAGGGTTGTAC                                    |
| <i>SICPD</i> -F for qRT-PCR and RT-PCR                       | ATCCAATTAACGTCCAACAT                                   |
| <i>SICPD</i> -R for qRT-PCR and RT-PCR                       | ACCTTTCATACACCTCCCTC                                   |
| <i>SIBRI1</i> -F for qRT-PCR                                 | TTCAATGGCACGATCCCGAA                                   |
| <i>SIBRI1</i> -R for qRT-PCR                                 | TGGGGAGAGGATACCCACAG                                   |
| <i>SIDWARF</i> -F for qRT-PCR                                | ATTCAATGCTTTGATTGGCA                                   |
| <i>SIDWARF</i> -R for qRT-PCR                                | GGGAGAGAAGTTGCAGGAAG                                   |
| <i>SICDKB1</i> -F for RT-PCR                                 | ATGGAGAAATACGAGAAATTGGAG                               |
| <i>SICDKB1</i> -R for RT-PCR                                 | ACGATGTAGAGAGAATGAGATAGC                               |
| <i>SICDKB2.1</i> -F for RT-PCR                               | ATGCTGGTAAGAGTGTATCGG                                  |
| <i>SICDKB2.1</i> -R for RT-PCR                               | CGGAGAGTAGTTGGAGGAAC                                   |
| <i>SIGA20ox1</i> -F for RT-PCR                               | CTCATTTC TAATGCTCATCGT                                 |
| <i>SIGA20ox1</i> -R for RT-PCR                               | R: TGCAGATGATTCTTTCTTAGCG                              |
| <i>Sl</i> GID1-F for RT-PCR                                  | GATCTTGATACACCTCTCAGTACTA                              |
| <i>Sl</i> GID1-R for RT-PCR                                  | ACAGCCTTACATATACTAACAAGAC                              |
| <i>SIDELLA</i> -F for RT-PCR                                 | TGATGCGACTATACTTGATATAAG                               |
| <i>SIDELLA</i> -R for RT-PCR                                 | GGGTTAATCTGTTTAATAGAGTTC                               |
| <i>SIBZR1</i> -F for RT-PCR                                  | AAGTATGCGTCAAATGTTC                                    |
| <i>SIBZR1</i> -R for RT-PCR                                  | TGCTCTTACCCTTGCTG                                      |
| <i>Sl</i> EXPA5-F for RT-PCR                                 | AAGGGTTCAAGAACTCAATGGCAAC                              |

|                              |                           |
|------------------------------|---------------------------|
| <i>SIEXPA5</i> -R for RT-PCR | ACCATCGCCTGTAGTGACCTTAAAG |
| <i>SIIAA17</i> -F for RT-PCR | TTAAGGCTAGGGTTGCCTGG      |
| <i>SIIAA17</i> -R for RT-PCR | AGCTGGGGTTTTGTGTGTTG      |
| <i>SIARF2A</i> -F for RT-PCR | GGATGGCAAAGGGCATAGTA      |
| <i>SIARF2A</i> -R for RT-PCR | TACGCTGCACCTCCTCTTTT      |
| <i>SIFW2.2</i> -F for RT-PCR | CTGGGATTGACAGGATTGCCT     |
| <i>SIFW2.2</i> -R for RT-PCR | TAGCTTGCCACCCTATTCCC      |
| <i>SIFW2.3</i> -F for RT-PCR | ATTACTCTCGTGGGCAAGGC      |
| <i>SIFW2.3</i> -R for RT-PCR | CTGAACCGAATGGTGCAAGC      |

---
